# Supplementary material
Source: Royal Society of Chemistry journal article supplement (doi:10.1039/d6cc01714b)
Supplement: d6cc01714b1.pdf [file d6cc01714b1.pdf]

## Supplementary Information

# Polymer-Confined Growth of Perovskite–PAN Composite Micro-ring Arrays for Uniform and Stable Lasing

*Xuanyue Li,<sup>†</sup> Haihua Zhang,<sup>\*,†</sup> Dexiang Zhu,<sup>†</sup> Hongbing Fu<sup>\*,†,‡</sup>*

<sup>†</sup> Institute of Molecular Plus (IMP), Collaborative Innovation Center of Chemical Science and Engineering (Tianjin), National Industry-Education Platform for Energy Storage (Tianjin), Tianjin University, Tianjin 300072, P. R. China.

<sup>‡</sup> Beijing Key Laboratory for Optical Materials and Photonic Devices, Department of Chemistry, Capital Normal University, Beijing 100048, P. R. China.

\* Email: [zhanghaihua@tju.edu.cn](mailto:zhanghaihua@tju.edu.cn); [hbfu@cnu.edu.cn](mailto:hbfu@cnu.edu.cn)

KEYWORDS: Perovskite, Polyacrylonitrile, Micro-ring array, In situ growth, Lasing

## Table of Contents

1. **Experimental Section**
2. **Fig. S1** PDMS template used for microring fabrication: (a) optical image; (b) enlarged view of the ring-patterned grooves.
3. **Fig. S2**  $\mu$ -PL spectra (a) and SEM images (b) of MAPbBr<sub>3</sub> micro-ring arrays.
4. **Fig. S3** XPS spectra (Pb 4f and N1s) of the MAPbBr<sub>3</sub> films and MAPbBr<sub>3</sub>@PAN composite films.
5. **Fig. S4** Schematic illustration of the home-built micro-photoluminescence ( $\mu$ -PL) setup used for lasing measurements.
6. **Fig. S5** Pump-fluence-dependent PL characterization of MAPbBr<sub>3</sub>@PAN composite films with different PAN addition amounts.
7. **Fig. S6** Pump-fluence-dependent PL characterization of MAPbBr<sub>3</sub>@PAN micro-rings for lasing threshold statistics in Fig. 2c.
8. **Fig. S7** Laser spectral stability of MAPbBr<sub>3</sub>@PAN micro-ring under high humidity conditions (20 °C, 60% humidity).
9. **Fig. S8** The lasing spectra of MAPbBr<sub>3</sub>@PAN micro-ring under different laser shots.
10. **Fig. S9** (a)  $\mu$ -PL spectra of MAPbX<sub>3</sub>@PAN micro-rings (b) Integrated  $\mu$ -PL intensities versus pump density.
11. **Tab. S1** Comparative summary of key parameters in micro/nanolaser arrays.

## **Experimental Section**

### **1.1 Materials.**

All perovskite starting materials (MABr, PbBr<sub>2</sub>, PbCl<sub>2</sub>, PbI<sub>2</sub>) were purchased from Xi'an Polymer Light Technology Corp. Polyacrylonitrile (PAN, Mw=100000) was purchased from Marklin. The N,N-Dimethylformamide (DMF, HPLC grade) was purchased from Beijing Chemical Agent Ltd., China.

### **1.2 Preparation of MAPbBr<sub>3</sub>@PAN solution**

The MAPbBr<sub>3</sub> perovskite solution was prepared by dissolving MABr and PbBr<sub>2</sub> in DMF, with the Pb<sup>2+</sup> concentration fixed at 0.1 mol/L. Subsequently, PAN was dissolved into this solution and stirred at 60 °C for 2 hours to obtain the MAPbBr<sub>3</sub>@PAN solution.

### **1.3 Preparation of polydimethylsiloxane (PDMS) template.**

The PDMS template was fabricated by replica molding against a silicon master mold featuring micro-ring convex structures prepared by photolithography. After curing, the PDMS template was peeled off from the silicon mold and cut into 1×1 cm<sup>2</sup> pieces prior to use. The diameter of the PDMS template ( $D = 20 \mu\text{m}$ ) is determined by the diameter of the convex silicon micro-rings.

### **1.4 Morphology and Structure Measurements.**

The morphologies using field emission scanning electron microscopy (FESEM, Thermo Fisher Scientific) at acceleration voltages of 10 kV. Microrings fabricated via the PDMS-assisted growth method require no sectioning treatment. These microrings are distributed independently and uniformly on the glass substrate. These microrings are distributed independently and uniformly on the glass substrate. A large number of microrings on the substrate can be transferred onto a copper grid using PDMS, and the transferred sample can be directly observed. Transmission

electron microscopy measurements were performed on a Thermo Scientific Talos F200X instrument at an accelerating voltage of 200 kV.

### **1.5 Laser Measurements.**

Laser measurements were conducted using a homebuilt inverted fluorescence microscope equipped with a 40× objective (NA = 0.9). The output from an optical parametric amplifier (Orpheus, Light Conversion; 400 nm, 1 kHz) was focused to a spot with a diameter of 200 μm. Photoluminescence (PL) spectra were acquired in a reflection configuration, with a movable aperture placed in the optical path at the front focal plane. The signal was collected and detected by a liquid-nitrogen-cooled CCD camera.

## Additional Information

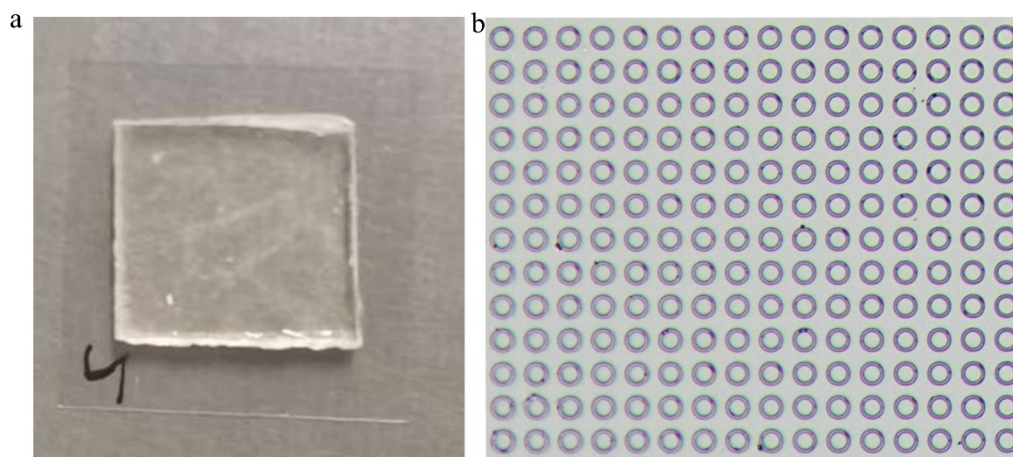

**Fig. S1** PDMS template used for microring fabrication: (a) optical image; (b) enlarged view of the ring-patterned grooves.

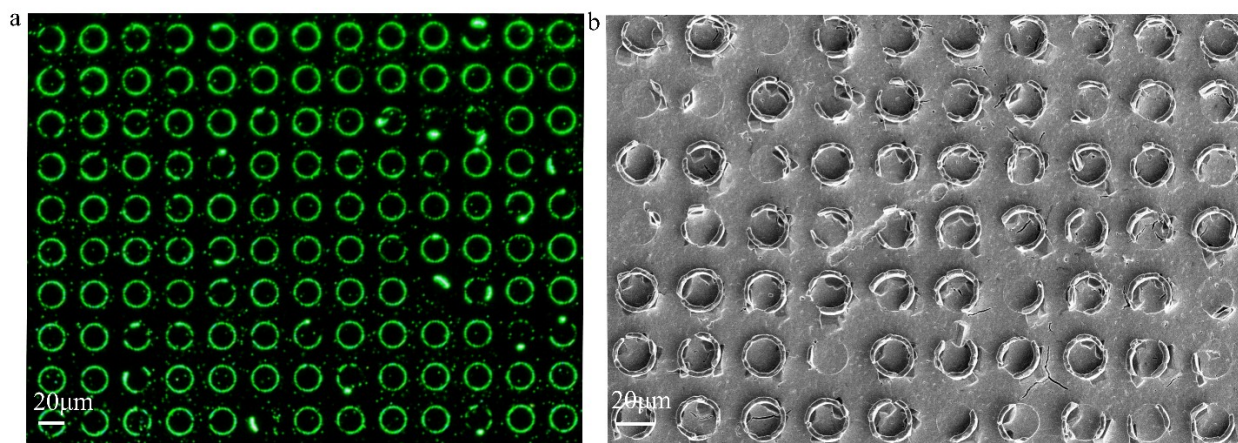

**Fig. S2**  $\mu$ -PL spectra (a) and SEM images (b) of MAPbBr<sub>3</sub> micro-ring arrays.

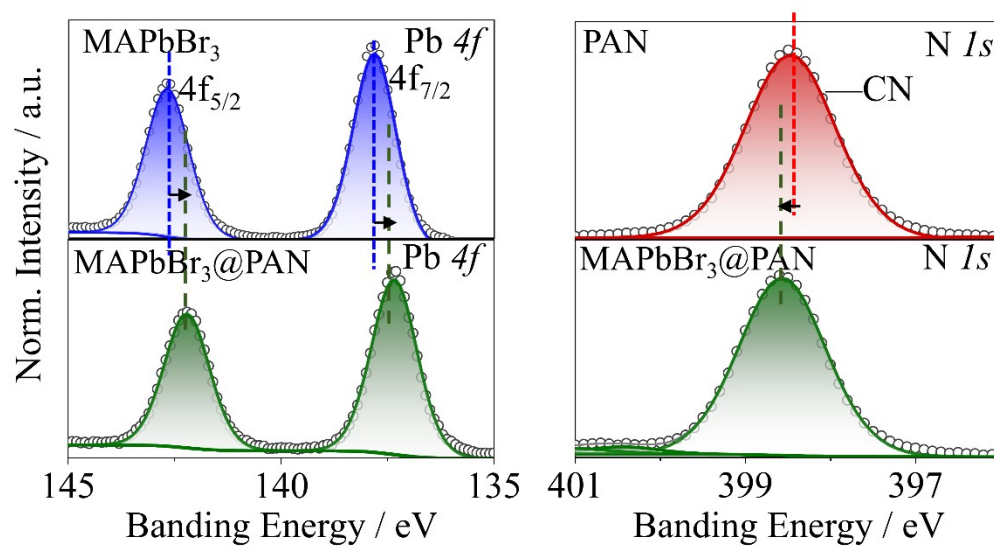

**Fig. S3** XPS spectra (Pb 4f and N1s) of the MAPbBr<sub>3</sub> films and MAPbBr<sub>3</sub>@PAN composite films.

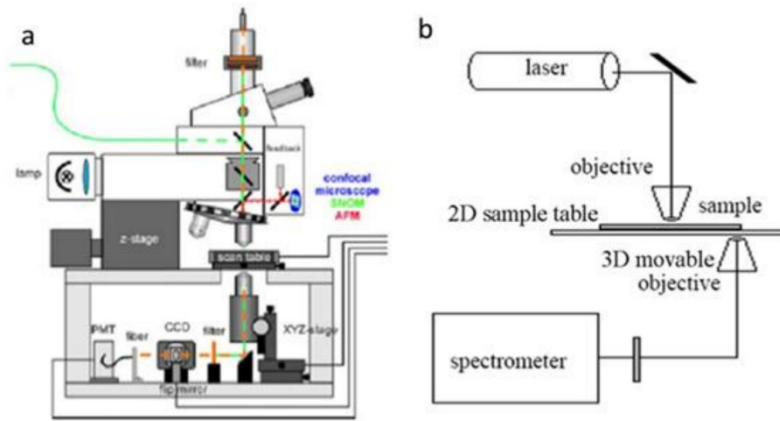

**Fig. S4** Schematic illustration of the home-built micro-photoluminescence ( $\mu$ -PL) setup used for lasing measurements.

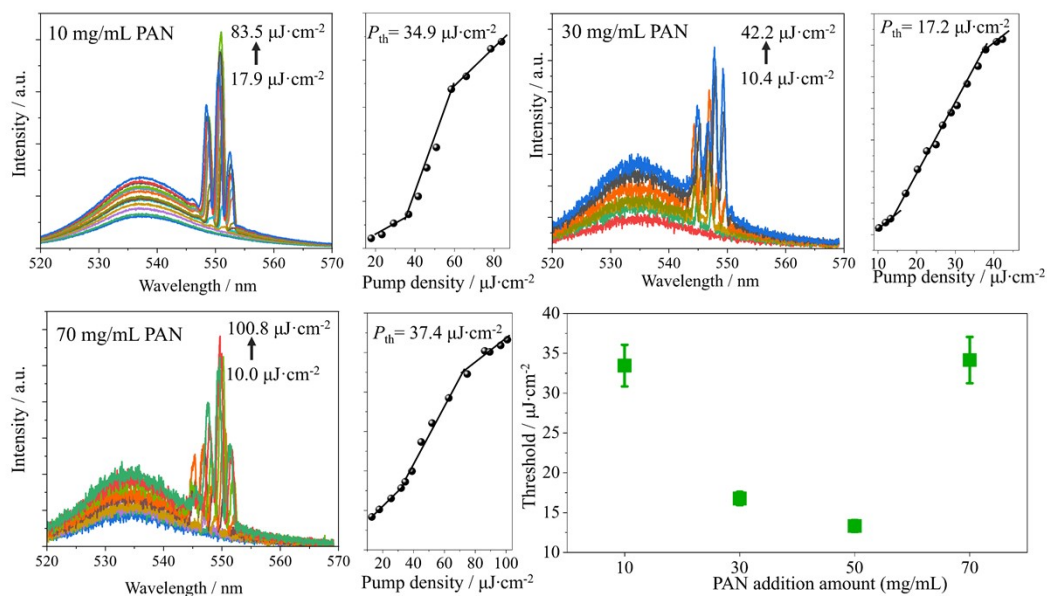

**Fig. S5** Pump-fluence-dependent PL characterization of MAPbBr<sub>3</sub>@PAN composite films with different PAN addition amounts.

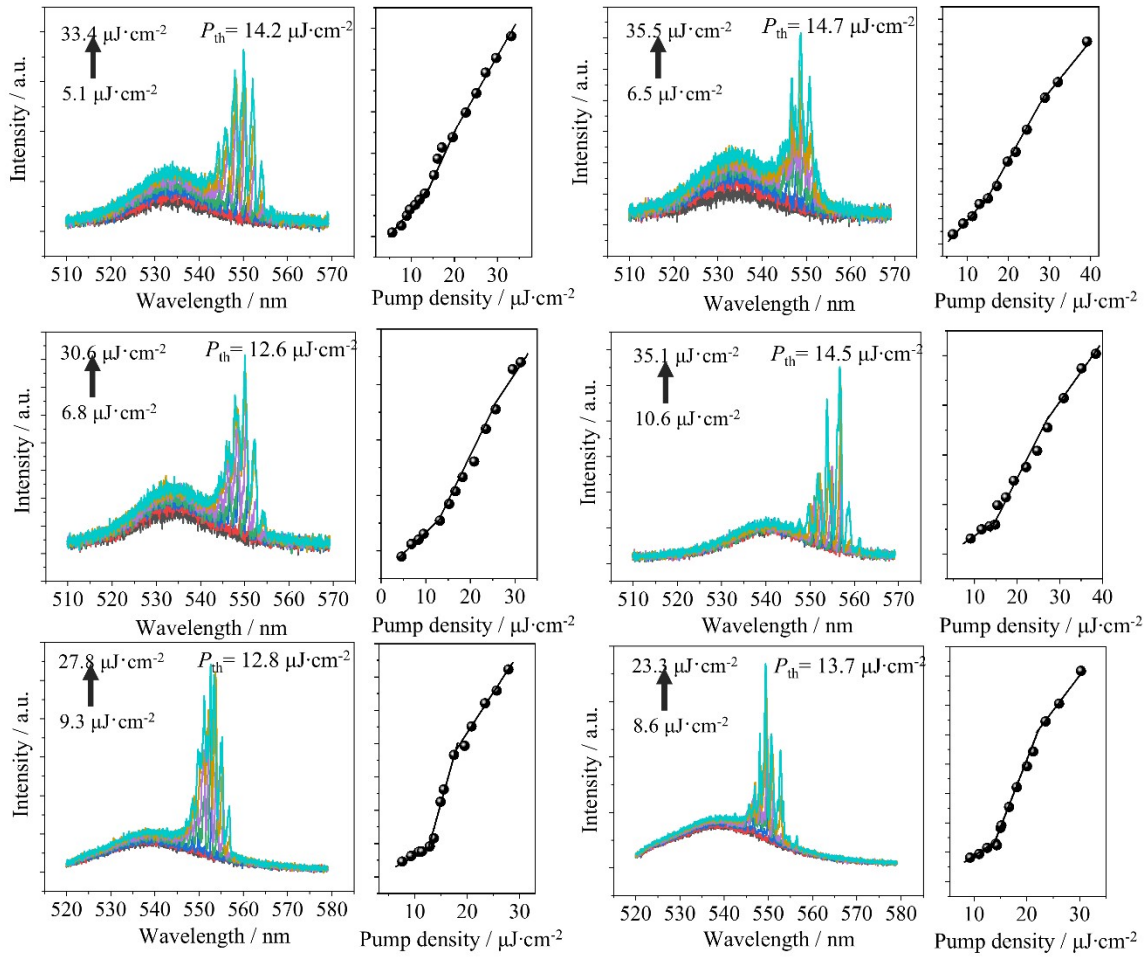

**Fig. S6** Pump-fluence-dependent PL characterization of MAPbBr<sub>3</sub>@PAN micro-rings for lasing threshold statistics in Figure 2c.

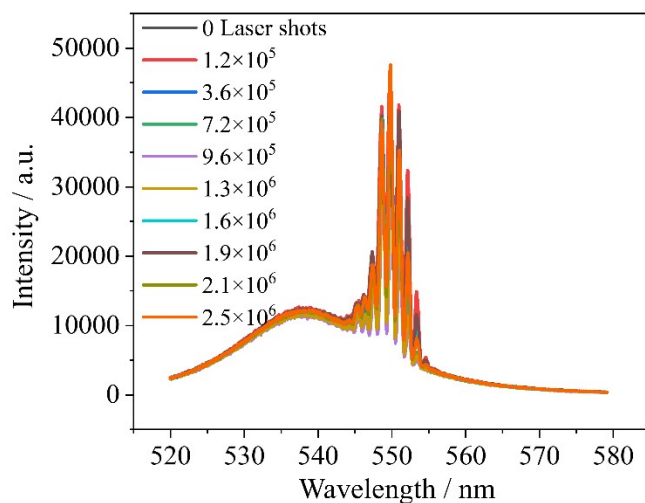

**Fig. S7** Laser spectral stability of MAPbBr<sub>3</sub>@PAN micro-ring under high humidity conditions (20 °C, 60% humidity).

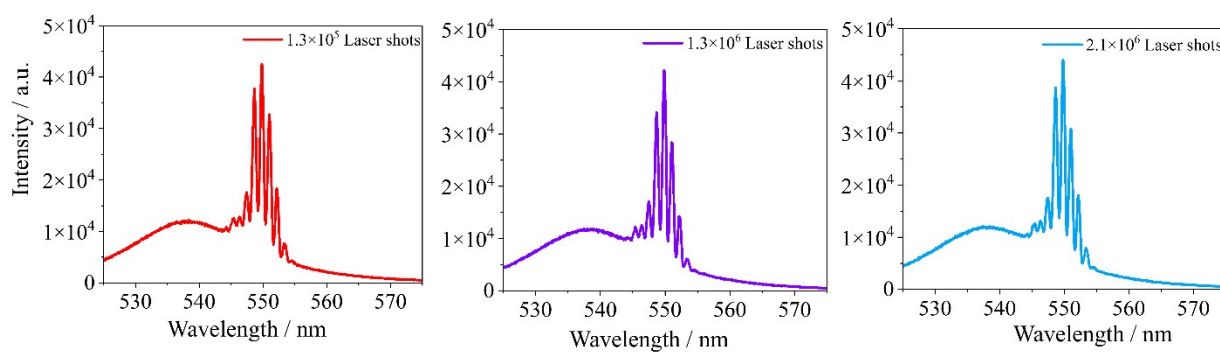

**Fig. S8** The lasing spectra of MAPbBr<sub>3</sub>@PAN micro-ring under different laser shots.

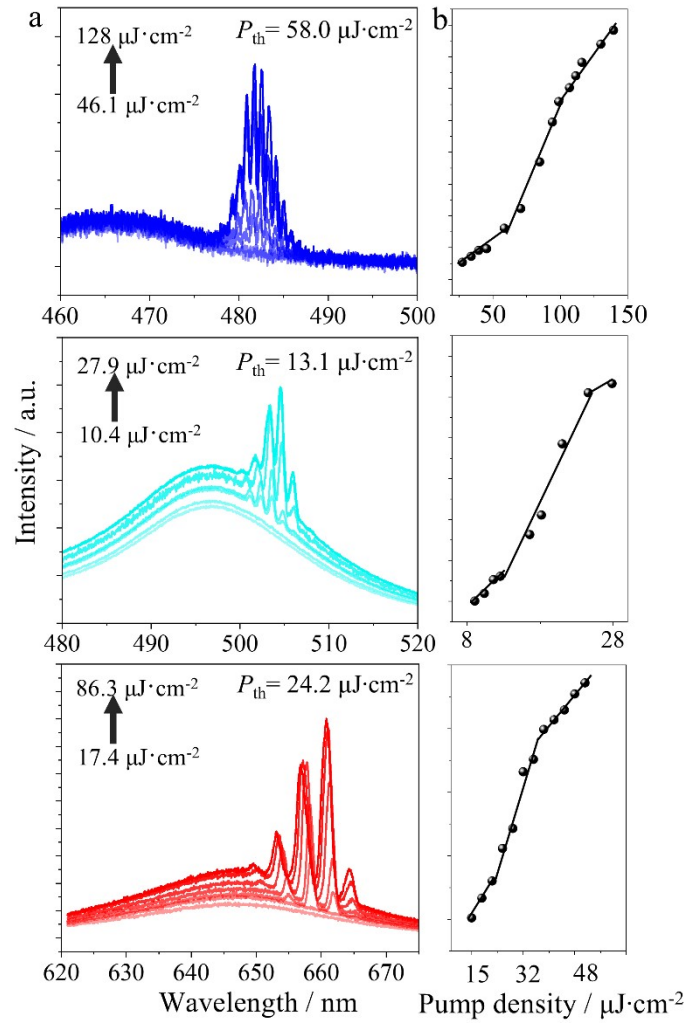

**Fig. S9** (a)  $\mu$ -PL spectra of  $\text{MAPbX}_3$ @PAN micro-rings (b) Integrated  $\mu$ -PL intensities versus pump density.

**Tab. S1** Comparative summary of key parameters in micro/nanolaser arrays.

| Materials                                                            | Lasing mode  | Pump source        | Threshold ( $\mu\text{J}\cdot\text{cm}^{-2}$ ) | Lasing wavelength (nm) | Q     | Year      | Ref  |
|----------------------------------------------------------------------|--------------|--------------------|------------------------------------------------|------------------------|-------|-----------|------|
| MAPbI <sub>3</sub>                                                   | WGM          | 400nm,50fs, 1kHz   | ~15                                            | ~792                   | 1210  | 2016      | [1]  |
| MAPbBr <sub>3</sub>                                                  | FP           | 400nm,100fs, 1kHz  | 5.9                                            | ~542                   |       | 2016      | [2]  |
| MAPbBr <sub>3</sub>                                                  | WGM          | 400nm,150fs, 1kHz  | 15.9                                           | 549                    |       | 2016      | [3]  |
| MAPbBr <sub>3</sub>                                                  | WGM          | 400nm,150fs, 1kHz  | 3.5                                            | 553                    | 1090  | 2016      | [4]  |
| CsPbCl <sub>3</sub>                                                  | WGM          | 400nm, 120fs, 1kHz | 15                                             | 426                    | 1032  | 2017      | [5]  |
| MAPbBr <sub>3</sub>                                                  | WGM          | 400nm,100fs, 1kHz  | 4.9                                            | 546                    | ~800  | 2017      | [6]  |
| MAPbBr <sub>3</sub>                                                  | FP           | 400nm,150fs, 1kHz  | 12.3                                           | 543                    | 500   | 2017      | [7]  |
| MAPbBr <sub>3</sub>                                                  | WGM          | 400nm,100fs, 1kHz  | 3.5                                            | 545                    | 3000  | 2017      | [8]  |
| BA <sub>2</sub> FA <sub>3</sub> Pb <sub>6</sub> Br <sub>19</sub>     | WGM          | 400nm, 150fs, 1kHz | 27.2                                           | 546-553                | 1800  | 2018      | [9]  |
| BA <sub>2</sub> MA <sub>3</sub> Pb <sub>6</sub> Br <sub>19</sub>     | WGM          | 400nm, 150fs, 1kHz | 12.2                                           | ~543                   | 2600  | 2018      | [10] |
| OA <sub>2</sub> MA <sub>n-1</sub> Pb <sub>n</sub> Br <sub>3n+1</sub> | WGM          | 400nm, 150fs, 1kHz | ~8                                             | ~545                   |       | 2018      | [11] |
| MAPbI <sub>3</sub>                                                   | WGM          | 400nm, 100fs, 1kHz | 59.2                                           | ~780                   |       | 2018      | [12] |
| CsPbBr <sub>3</sub>                                                  | WGM          | 400nm,60fs         | ~3                                             | ~550                   | 1555  | 2019      | [13] |
| CsPbBr <sub>3</sub>                                                  |              |                    | 3                                              | 530                    |       | 2019      | [14] |
| CsPbBr <sub>3</sub> QDs                                              | FP           | 400nm, 120fs, 1kHz | 37.6                                           | ~536                   |       | 2020      | [15] |
| MAPbBr <sub>3</sub>                                                  |              | 400nm              | 70.8                                           | ~530                   | 885   | 2020      | [16] |
| MAPbBr <sub>3</sub>                                                  | WGM          | 400nm, 100fs, 1kHz | 16.2                                           | ~551                   |       | 2020      | [17] |
| CsPbBr <sub>3</sub>                                                  | WGM          | 400nm, 200fs, 1kHz | 4                                              | 545                    | 6806  | 2020      | [18] |
| CsPbBr <sub>3</sub> NCs                                              | WGM          | 400nm, 250fs       | 3.8                                            | ~530                   | 2200  | 2021      | [19] |
| CsPbBr <sub>3</sub>                                                  | Random laser | 400nm, 100fs, 1kHz | 25                                             | ~540                   |       | 2021      | [20] |
| MAPbBr <sub>3</sub>                                                  | FP           | 400nm, 100fs, 1kHz | 43.7                                           | 549                    | 1483  | 2021      | [21] |
| FAPbBr <sub>3</sub>                                                  | FP           | 400nm, 100fs, 1kHz | 19.9                                           | ~550                   | 2404  | 2021      | [21] |
| CsPbI <sub>3</sub>                                                   | WGM          | 800nm, 30fs, 1kHz  | 0.22                                           | 649                    |       | 2021      | [22] |
| CsPbBr <sub>3</sub>                                                  |              | 400nm, 120fs, 1kHz | 18.8                                           | ~540                   | ~1000 | 2022      | [23] |
| MAPbBr <sub>3</sub>                                                  | WGM          | 400nm, 150fs, 1kHz | 15.1                                           | ~550                   | ~1000 | 2022      | [24] |
| MAPbBr <sub>3</sub>                                                  | WGM          | 400nm, 50fs, 1kHz  | 35                                             | ~550                   | 1135  | 2023      | [25] |
| CsPbBr <sub>3</sub>                                                  |              | 400nm, 150fs, 1kHz | 40                                             | 540                    |       | 2023      | [26] |
| MAPbBr <sub>3</sub>                                                  | WGM          | 395nm, 1kHz        | 4.14                                           | 555                    | 2915  | 2023      | [27] |
| CsPbBr <sub>3</sub>                                                  | Random laser | 400nm, 100fs, 1kHz | 8.3                                            | 539                    | 1740  | 2024      | [28] |
| MAPbBr <sub>3</sub>                                                  | WGM          | 450nm, 50ns,10Hz   | 14                                             | 556                    | 1544  | 2024      | [26] |
| BA <sub>2</sub> Cs <sub>n-1</sub> Pb <sub>n</sub> Br <sub>3n+1</sub> | FP           | 400nm, 50fs, 1kHz  | 7.8                                            | 560                    | 2340  | 2024      | [29] |
| MAPbBr <sub>3</sub>                                                  | WGM          |                    | 14.7                                           | 549                    | 2113  | 2025      | [30] |
| CsPbBr <sub>3</sub> QDs                                              | WGM          | 400nm, 150fs, 1kHz | 6.6                                            | 530                    | 1808  | 2025      | [31] |
| CsPbBr <sub>3</sub> QDs                                              |              | 400nm, 50fs, 1 kHz | 15                                             | 540                    |       | 2026      | [32] |
| MAPbBr <sub>3</sub> @PAN                                             | WGM          | 400nm, 1 kHz       | 12.8                                           | 545                    | 2126  | This work |      |

- [1] X. Liu, L. Niu, C. Wu, C. Cong, H. Wang, Q. Zeng, H. He, Q. Fu, W. Fu, T. Yu, C. Jin, Z. Liu and T. Sum, *Adv. Sci.*, 2016, **3**, 1600137.
- [2] K. Wang, Z. Gu, S. Liu, W. Sun, N. Zhang, S. Xiao and Q. Song, *J. Phys. Chem. Lett.*, 2016, **7**, 2549 – 2555.
- [3] Z. Gu, K. Wang, H. Li, M. Gao, L. Li, M. Kuang, Y. Zhao, M. Li and Y. Song, *Small*, 2017, **13**, 1603217.
- [4] J. Feng, X. Yan, Y. Zhang, X. Wang, Y. Wu, B. Su, H. Fu and L. Jiang, *Adv. Mater.*, 2016, **28**, 3732 – 3741.
- [5] X. He, P. Liu, H. Zhang, Q. Liao, J. Yao and H. Fu, *Adv. Mater.*, 2017, **29**, 1604510.
- [6] K. Wang, W. Sun, S. Wang, S. Liu, N. Zhang, S. Xiao and Q. Song, *Adv. Optical Mater.*, 2017, **5**, 1600744.
- [7] P. Liu, X. He, J. Ren, Q. Liao, J. Yao and H. Fu, *ACS Nano*, 2017, **11**, 5766 – 5773.
- [8] Z. Duan, Y. Wang, G. Li, S. Wang, N. Yi, S. Liu, S. Xiao and Q. Song, *Laser & Photonics Rev.*, 2018, **12**, 1700234.
- [9] H. Zhang, Y. Wu, Q. Liao, Z. Zhang, Y. Liu, Q. Gao, P. Liu, M. Li, J. Yao and H. Fu, *Angew. Chem. Int. Ed.*, 2018, **57**, 7748 – 7752.
- [10] H. Zhang, Q. Liao, Y. Wu, Z. Zhang, Q. Gao, P. Liu, M. Li, J. Yao and H. Fu, *Adv. Mater.*, 2018, **30**, 1706186.
- [11] M. Li, Q. Wei, S. Muduli, N. Yantara, Q. Xu, N. Mathews, S. Mhaisalkar, G. Xing and T. Sum, *Adv. Mater.*, 2018, **30**, 1707235.
- [12] C. Huang, W. Sun, Y. Fan, Y. Wang, Y. Gao, N. Zhang, K. Wang, S. Liu, S. Wang, S. Xiao and Q. Song, *ACS Nano*, 2018, **12**, 3865 – 3874.
- [13] Z. Yang, J. Lu, M. ZhuGe, Y. Cheng, J. Hu, F. Li, S. Qiao, Y. Zhang, G. Hu, Q. Yang, D. Peng, K. Liu and C. Pan, *Adv. Mater.*, 2019, **31**, 1900647.
- [14] A. Schlaus, M. Spencer, K. Miyata, F. Liu, X. Wang, I. Datta, M. Lipson, A. Pan and X. Zhu, *Nat. Commun.*, 2019, **10**, 265.
- [15] X. Hu, C. Lu, Q. Wang, J. Xu and Y. Cui, *Rsc Adv.*, 2020, **10**, 38220 – 38226.
- [16] S. Li, H. Xia, G. Zhang, X. Xu, Y. Yang, G. Wang and H. Sun, *Adv. Mater. Technol.*, 2020, **5**, 2000051.
- [17] K. Wang, Y. Du, J. Liang, J. Zhao, F. Xu, X. Liu, C. Zhang, Y. Yan and Y. Zhao, *Adv. Mater.*, 2020, **32**, 2001999.
- [18] Z. Gu, Z. Zhou, Z. Huang, K. Wang, Z. Cai, X. Hu, L. Li, M. Li, Y. Zhao and Y. Song, *Adv. Mater.*, 2020, **32**, 1908006.

- [19] D. Xing, C. Lin, Y. Ho, A. Kamal, I. Wang, C. Chen, C. Wen, C. Chen and J. Delaunay, *Adv. Funct. Mater.*, 2021, **31**, 2006283.
- [20] X. Chen, K. Wang, B. Shi, T. Liu, R. Chen, M. Zhang, W. Wen, G. Xing and J. Wu, *ACS Appl. Mater. Interfaces*, 2021, **13**, 30891 – 30901.
- [21] S. Yan, K. Wang, G. Xing, J. Xu, S. Su, Z. Tang, S. Wang and K. Ng, *ACS Appl. Mater. Interfaces*, 2021, **13**, 38458 – 38466.
- [22] S. Lan, Y. Peng, H. Shen, S. Wang, J. Ren, Z. Zheng, W. Liu and D. Li, *Laser & Photonics Rev.*, 2021, **15**, 2000428.
- [23] J. Liang, K. Wang, Y. Du, C. Zhang, Y. Yan and Y. Zhao, *ACS Appl. Mater. Interfaces*, 2022, **14**, 1774 – 1782.
- [24] Z. Zhang, F. Vogelbacher, J. De, Y. Wang, Q. Liao, Y. Tian, Y. Song and M. Li, *Angew. Chem. Int. Ed.*, 2022, **61**, e202205636.
- [25] P. Ma, L. Yan, J. Si, T. Huo, Z. Huang, W. Tan, J. Xu and X. Hou, *Laser & Photonics Rev.*, 2023, **17**, 2300533.
- [26] A. Berestennikov, S. Kiriushchikina, A. Vakulenko, A. Pushkarev, A. Khanikaev and S. Makarov, *ACS Nano*, 2023, **17**, 4445 – 4452.
- [27] Z. Xu, X. Han, W. Wu, F. Li, R. Wang, H. Lu, Q. Lu, B. Ge, N. Cheng, X. Li, G. Yao, H. Hong, K. Liu and C. Pan, *Light-Science & Applications*, 2023, **12**, 67.
- [28] Y. Tan, L. Yang, H. Song, M. Huang, J. Huang, W. Ali, F. Li and Z. Li, *Small*, 2024, **20**, 2401596.
- [29] C. Zhao, J. Guo, J. Tao, J. Chu, S. Chen and G. Xing, *Light-Science & Applications*, 2024, **13**, 170.
- [30] B. Liu, J. Guo, H. Zhang, Y. Tang, L. Qin, Z. Lou, Y. Hu, F. Teng and Y. Hou, *J. Mater. Chem. C*, 2025, **13**, 6233 – 6239.
- [31] Y. Ding, H. Zhang and H. Fu, *J. Phys. Chem. Lett*, 2025, **16**, 6781 – 6786.
- [32] S. Zheng, Q. Ji, Y. Chen, W. Shao, C. Guo, B. Zhu, Y. Chen, J. Yu and S. Deng, *ACS Nano*, 2026, **20**, 7228 – 7237.
